# Supplementary material for: Novel Chemical Cross-Linked Ionogel Based on Acrylate Terminated Hyperbranched Polymer with Superior Ionic Conductivity for High Performance Lithium-Ion Batteries
Source: MDPI journal article supplement (doi:10.3390/polym11030444), 2019-03-07
Supplement: s1 [file s1]

## Electronic Supplementary Information

### Novel chemical cross-linked ionogel based on acrylate terminated hyperbranched polymer with superior ionic conductivity for high performance lithium-ion batteries

*Kang Zhao, Hongzan Song, Xiaoli Duan, Zihao Wang, Jiahang Liu, Xinwu Ba.*

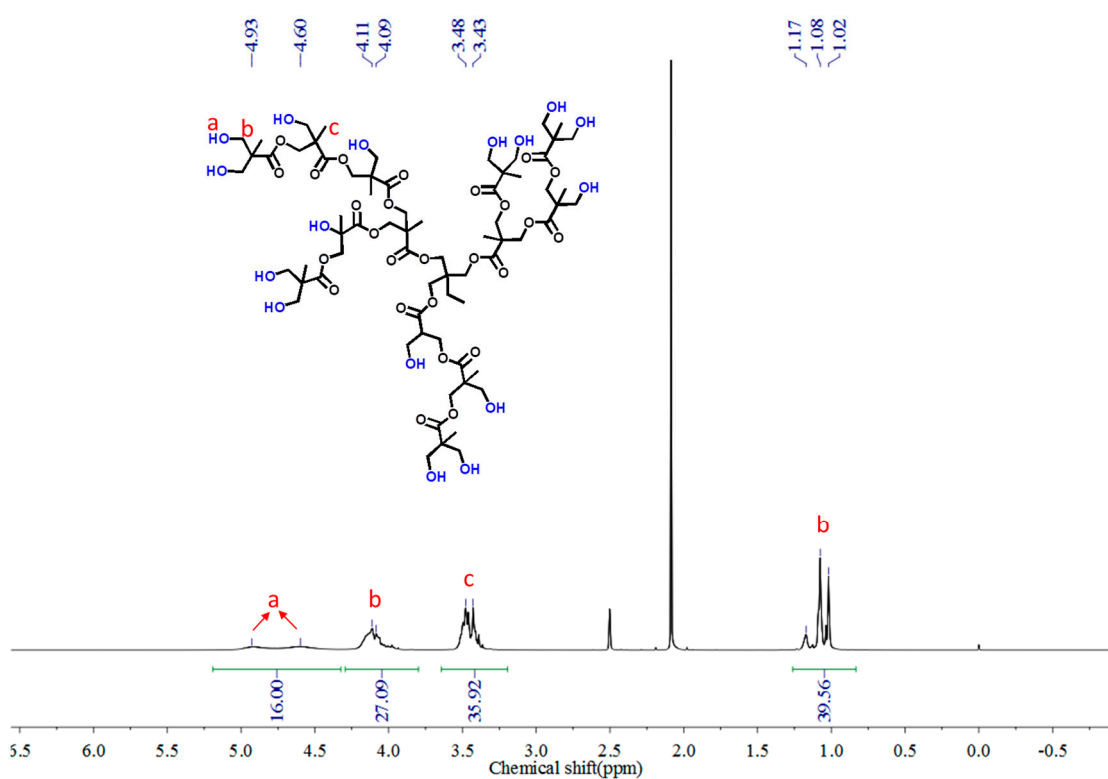

**Figure S1**  $^1\text{H}$  NMR spectra of HP-OH.

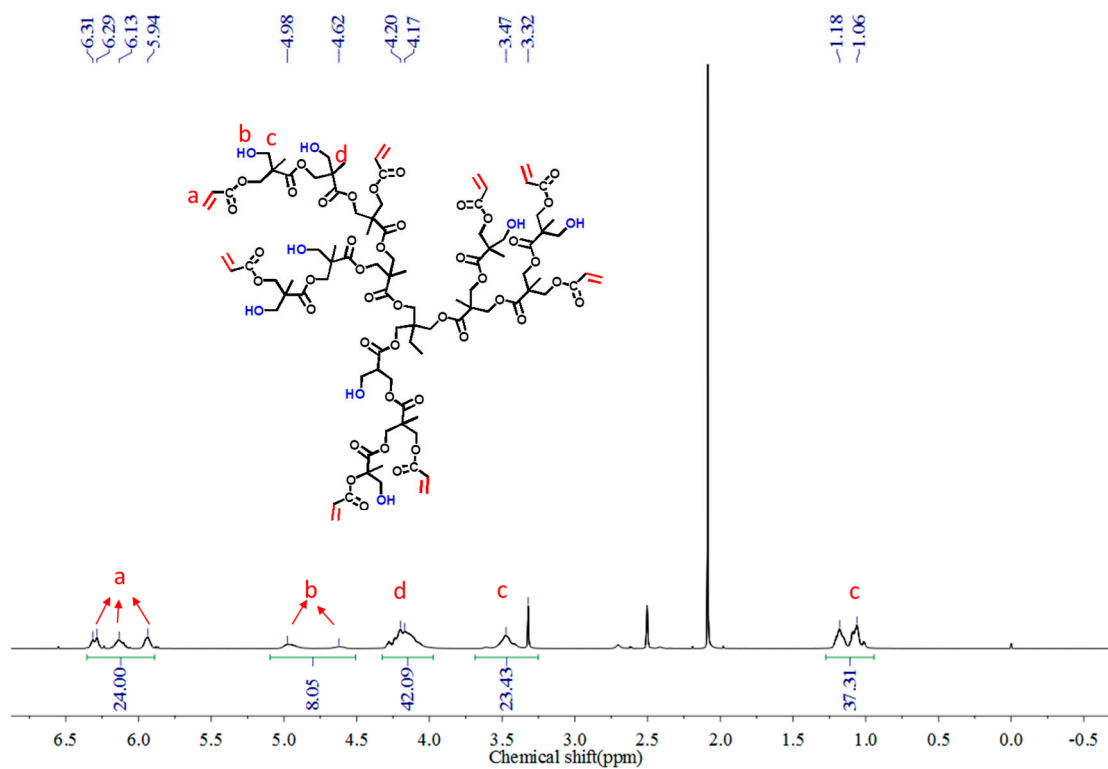

**Figure S2**  $^1\text{H}$  NMR spectra of HP-A.

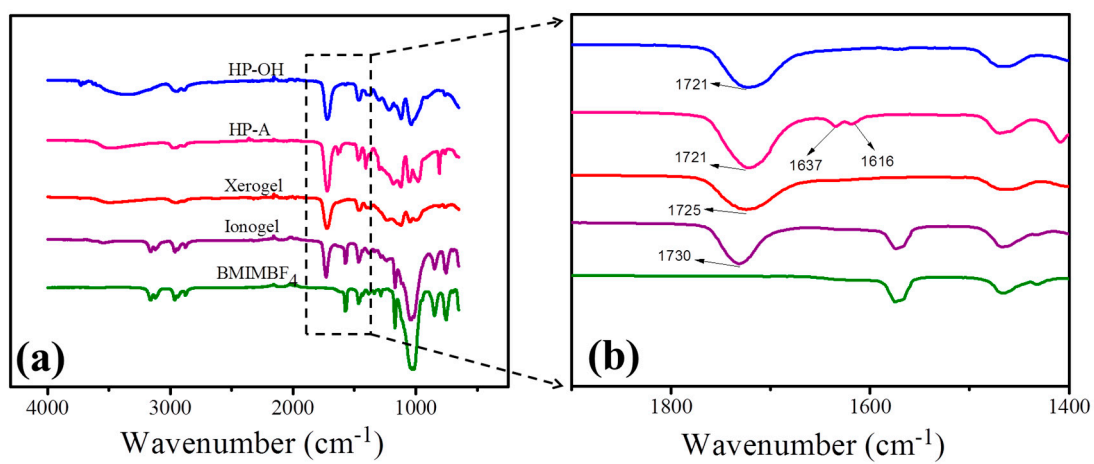

**Figure S3** (a) FTIR patterns of neat HP-OH, HP-A, BMIMBF<sub>4</sub>, Xerogel, and ionogels. (b) The right pattern is the magnified FTIR patterns from 1400 to 1900  $\text{cm}^{-1}$ .

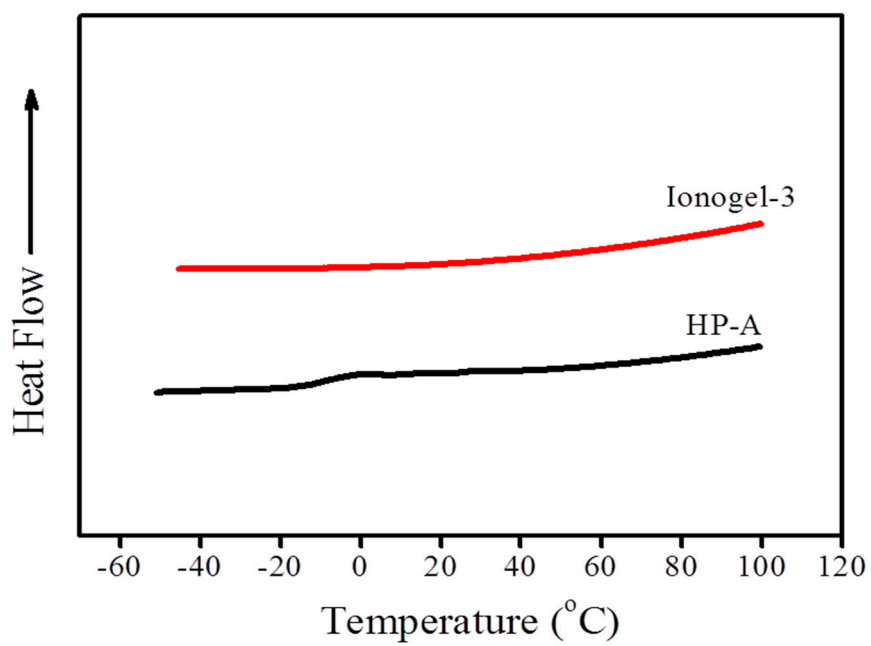

**Figure S4** The melting DSC curves of HP-A and Ionogel-3 at a heating rate of 20 °C/min.

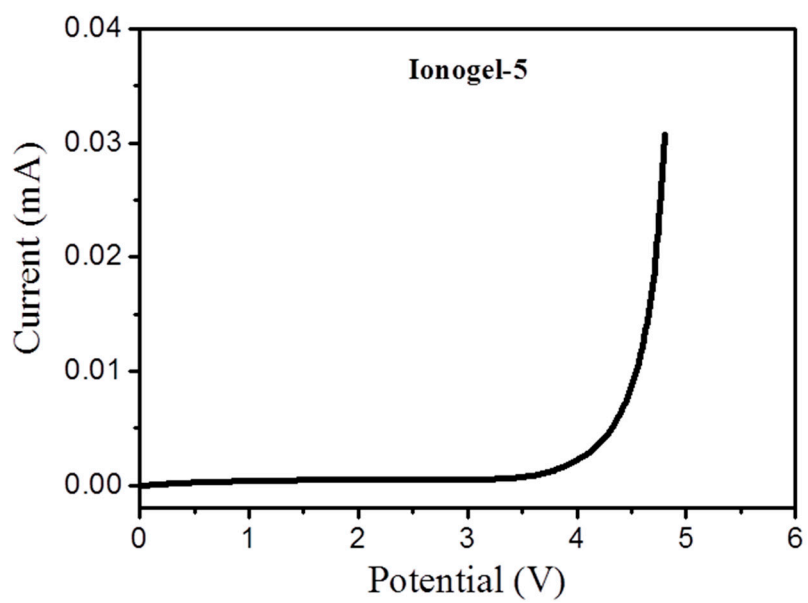

**Figure S5** Linear sweep voltammograms of ionogel-5 at room temperature.
